# Supplementary material for: Effects of Partial Organic Substitution for Chemical Fertilizer on Antibiotic Residues in Peri-Urban Agricultural Soil in China
Source: MDPI journal article supplement (doi:10.3390/antibiotics10101173), 2021-09-27
Supplement: s1 [file s1]

**Table S1.** Matrix of loading scores for the principal component analysis of soil quality.

| Variables               | PC1   | PC2   | PC3   | PC4   |
|-------------------------|-------|-------|-------|-------|
| SOC                     | 0.38  | 0.11  | -0.25 | 0.08  |
| pH                      | 0.30  | -0.47 | 0.10  | 0.09  |
| C/N                     | 0.33  | -0.43 | 0.04  | 0.14  |
| TP                      | 0.40  | -0.02 | -0.11 | 0.11  |
| TK                      | 0.00  | 0.42  | 0.68  | -0.16 |
| AN                      | 0.07  | 0.52  | -0.59 | 0.10  |
| AP                      | 0.37  | 0.18  | 0.11  | 0.19  |
| AK                      | 0.34  | 0.20  | 0.13  | 0.14  |
| sand                    | -0.34 | -0.10 | -0.05 | 0.47  |
| silt                    | 0.13  | -0.12 | -0.21 | -0.81 |
| clay                    | 0.32  | 0.18  | 0.18  | -0.01 |
| Eigenvalue              | 5.31  | 1.72  | 1.17  | 1.15  |
| Explained variation (%) | 48.31 | 15.63 | 10.59 | 10.47 |

**Table S2.** Matrix of loading scores for the principal component analysis of antibiotic residues.

| Variables               | PC1   | PC2   |
|-------------------------|-------|-------|
| SAs                     | 0.58  | 0.06  |
| TCs                     | 0.48  | 0.53  |
| QNs                     | 0.61  | -0.13 |
| MLs                     | -0.26 | 0.84  |
| Eigenvalue              | 2.18  | 1.11  |
| Explained variation (%) | 54.54 | 27.87 |

**Table S3.** Cultivation and fertilization management practices in the vegetable field [48].

| Vegetable       | Management Date |              |            | Nutrient Input (kg/ha) |                               |                  |
|-----------------|-----------------|--------------|------------|------------------------|-------------------------------|------------------|
|                 | Nutrient Input  | Harvest Time | Herbicide  | N                      | P <sub>2</sub> O <sub>5</sub> | K <sub>2</sub> O |
| Water spinach   | 2017/7/1        | 2017/7/22    | 2017/6/22  | 240                    | 240                           | 240              |
|                 | 2017/8/15       | 2017/9/6     |            | 180                    | 180                           | 180              |
| Spinach         | 2017/10/29      | 2018/1/13    | 2017/10/19 | 180                    | 100                           | 180              |
| Chinese cabbage | 2018/3/15       | 2018/5/1     | 2018/3/5   | 180                    | 68.58                         | 120              |
| Amaranth        | 2018/5/9        | 2018/6/20    | 2018/5/5   | 135                    | 68.58                         | 120              |

**Table S4.** Recoveries, limits of detection (LOD) and limits of quantification (LOQs) for the determining method in soil.

| Groups | Analytes          | Internal Standard    | LODs (ng/g) | LODs (ng/g) | Recovery ± SD (%) |
|--------|-------------------|----------------------|-------------|-------------|-------------------|
| SAs    | Sulfamerazine     | SMR- <sup>13</sup> C | 0.1         | 0.3         | 71.6±13.8         |
|        | Sulfamethazine    | SMR- <sup>13</sup> C | 0.05        | 0.2         | 50.3±11.1         |
|        | Sulfamethoxazole  | SMR- <sup>13</sup> C | 0.1         | 0.3         | 84.4±14.2         |
| TCs    | Chlortetracycline | TC-D <sub>6</sub>    | 2           | 6.7         | 88.9±14.6         |
|        | Oxytetracycline   | TC-D <sub>6</sub>    | 2           | 6.7         | 75.2±15.0         |
|        | Tetracycline      | TC-D <sub>6</sub>    | 2           | 6.7         | 80.6±12.8         |
|        | Doxycycline       | TC-D <sub>6</sub>    | 2           | 6.7         | 104.8±14.9        |
|        | Norfloxacin       | NOR-D <sub>5</sub>   | 0.5         | 1.7         | 96.2±15.2         |
| QNs    | Ciprofloxacin     | NOR-D <sub>5</sub>   | 0.5         | 1.7         | 65.3±13.8         |
|        | Enrofloxacin      | NOR-D <sub>5</sub>   | 0.1         | 0.3         | 59.6±12.3         |
|        | Ofloxacin         | NOR-D <sub>5</sub>   | 0.2         | 0.7         | 71.3±14.0         |
|        | Lomefloxacin      | NOR-D <sub>5</sub>   | 0.2         | 0.7         | 106.9±14.6        |

|     |                |                                     |      |      |           |
|-----|----------------|-------------------------------------|------|------|-----------|
| MLs | Erythromycin   | ERY- <sup>13</sup> C-D <sub>3</sub> | 0.05 | 0.2  | 90.0±13.9 |
|     | Clarithromycin | ERY- <sup>13</sup> C-D <sub>3</sub> | 0.01 | 0.03 | 93.4±19.1 |
|     | Tylosin        | ERY- <sup>13</sup> C-D <sub>3</sub> | 0.05 | 0.2  | 70.5±13.9 |
|     | Roxithromycin  | ERY- <sup>13</sup> C-D <sub>3</sub> | 0.5  | 1.7  | 94.6±9.3  |

|               |    |         |        |                 |    |          |        |
|---------------|----|---------|--------|-----------------|----|----------|--------|
| 50% S         | 19 | 18      | 100% N | 25% P           | 7  | 1        | CK     |
| 25% P         | 20 | 17      | 50% P  | 100% N          | 8  | 2        | 25% S  |
| 100% N        | 21 | 16      | CK     | 25% S           | 9  | 3        | 50% P  |
| 25% S         | 22 | 15      | 50% S  | 50% P           | 10 | 4        | 100% N |
| 50% P         | 23 | 14      | 25% P  | CK              | 11 | 5        | 50% S  |
| CK            | 24 | 13      | 25% S  | 50% S           | 12 | 6        | 25% P  |
| Water spinach |    | Spinach |        | Chinese cabbage |    | Amaranth |        |

**Figure S1.** Sketch map of experimental blocks in this study.

## References:

[48] Tang, Q.; Ti, C.; Xia, L.; Xia, Y.; Wei, Z.; Yan, X. Ecosystem services of partial organic substitution for chemical fertilizer in a peri-urban zone in China. *J. Clean. Prod.* **2019**, 224, 779-788.
